# Supplementary material
Source: PubMed Central journal article supplement (PMC3771285)
Supplement: SD2.pdf [file SD2.pdf]

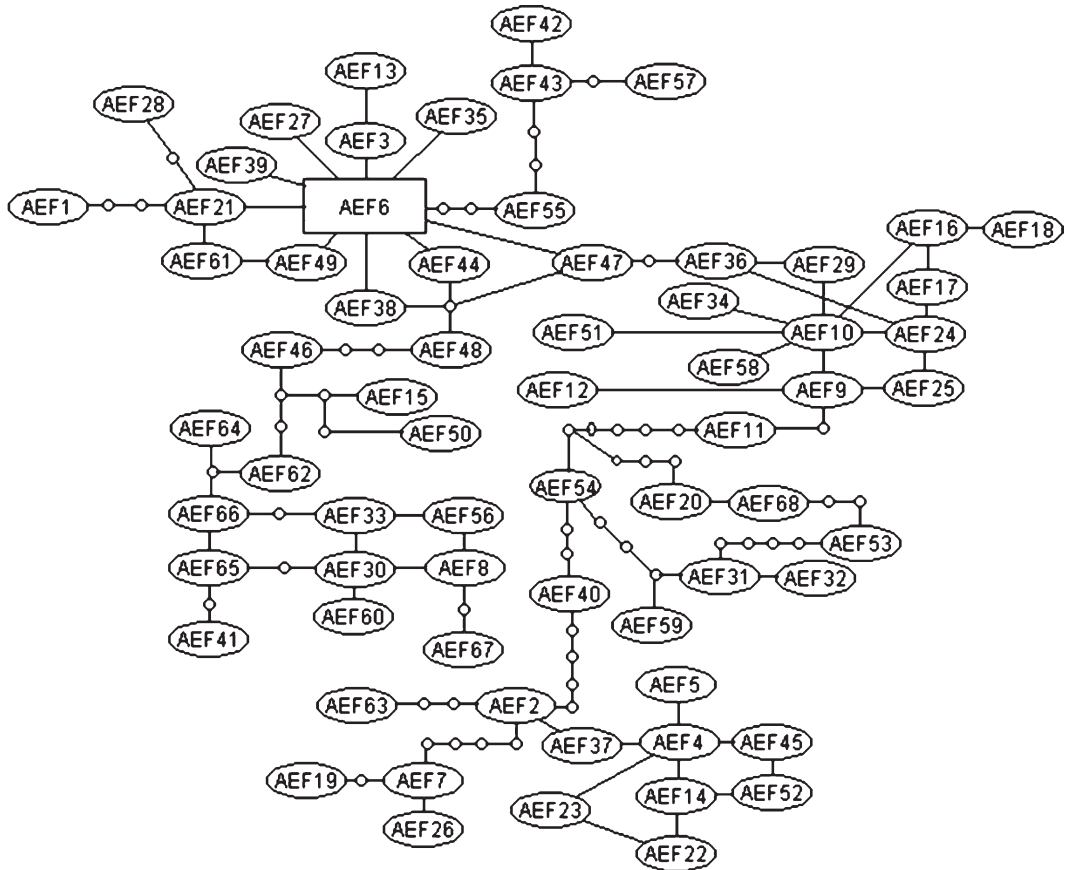

SUPPLEMENTAL FIGURE 1. Relationship between identified partial *ND4* and *ND5* haplotypes from cemeteries in south Florida (empty circles = missing haplotypes; rectangle = ancestral haplotype). Figure generated using TCS software.

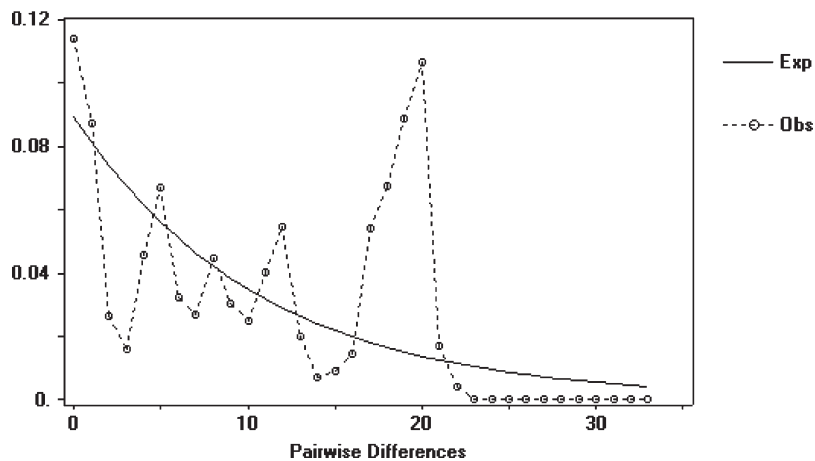

SUPPLEMENTAL FIGURE 2. Frequency spectrum of observed mismatch pairwise differences of 362 *Ae. aegypti* individuals from south Florida (y axis = frequency).

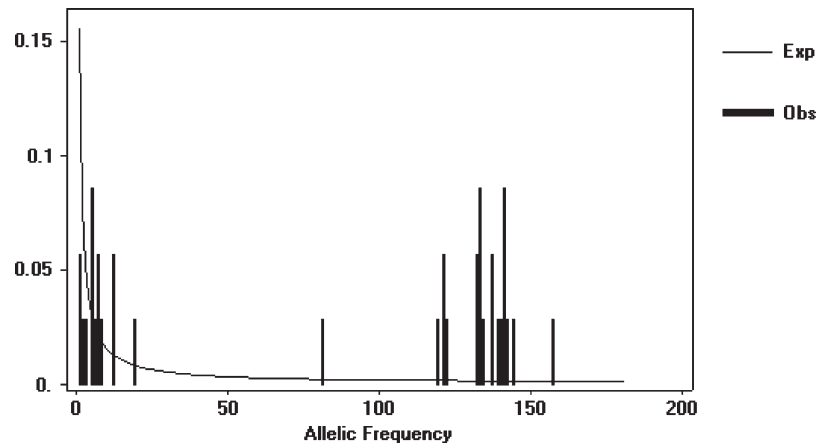

SUPPLEMENTAL FIGURE 3. Frequency spectrum of observed numbers of segregating sites in the 760-bp sequence of partial *ND4* and *ND5* mitochondrial DNA sequences amplified in 362 *Ae. aegypti* individuals from south Florida (y axis = frequency).

SUPPLEMENTAL TABLE 1  
*Aedes aegypti* collection cemeteries in south Florida

| Coast               | City            | Cemetery              | Latitude, Longitude | # Of vases collected per cemetery (# positive for <i>Ae. aegypti</i> ) | # <i>Ae. aegypti</i> amplified per cemetery (# vases amplified <i>Ae. aegypti</i> came from/total # of mosquitoes collected per cemetery) |             |
|---------------------|-----------------|-----------------------|---------------------|------------------------------------------------------------------------|-------------------------------------------------------------------------------------------------------------------------------------------|-------------|
| West Coast          | Tampa           | Lake Carroll          | 28.0599N, 82.4834W  | 14 (5)                                                                 | 6 (5/15)                                                                                                                                  |             |
|                     |                 | Marti Cemetery        | 27.9656N, 82.4946W  | 14 (13)                                                                | 10 (5/136)                                                                                                                                |             |
|                     |                 | North 25th Cemetery   | 27.9812N, 82.4344W  | 13 (7)                                                                 | 10 (5/115)                                                                                                                                |             |
|                     |                 | Rose Hill Cemetery    | 27.9868N, 82.4079W  | 20 (12)                                                                | 10 (5/46)                                                                                                                                 |             |
|                     |                 | Shady Grove Cemetery  | 28.0013N, 82.3741W  | 15 (6)                                                                 | 9 (5/45)                                                                                                                                  |             |
|                     |                 | Woodlawn Memorial     | 27.9761N, 82.4663W  | 27 (19)                                                                | 9 (5/81)                                                                                                                                  |             |
|                     |                 | Oak lawn Memorial     | 27.9528N, 82.4544W  | 11 (4)                                                                 | 4 (4/13)                                                                                                                                  |             |
|                     | St. Petersburg  | Largo Cemetery        | 27.9333N, 82.7981W  | 12 (12)                                                                | 12 (12/91)                                                                                                                                |             |
|                     |                 | Calvary Catholic      | 27.8813N, 82.7118W  | 13 (3)                                                                 | 3 (3/6)                                                                                                                                   |             |
|                     |                 | Lakeview Cemetery     | 27.9506N, 82.7955W  | 14 (14)                                                                | 14 (14/178)                                                                                                                               |             |
|                     |                 | Northern Memorial     | 27.8234N, 82.7036W  | 19 (17)                                                                | 17 (17/125)                                                                                                                               |             |
|                     |                 | Royal Palm Memorial   | 27.7690N, 82.7116W  | 16 (15)                                                                | 12 (12/125)                                                                                                                               |             |
|                     |                 | Sunnyside Cemetery    | 27.8209N, 82.5662W  | 17 (17)                                                                | 17 (17/179)                                                                                                                               |             |
|                     |                 | City of Palmetto      | 27.5210N, 82.5809W  | 9 (9)                                                                  | 8 (8/214)                                                                                                                                 |             |
|                     | Palmetto        | Fogartyville Cemetery | 27.5026N, 82.6036W  | 15 (15)                                                                | 14 (14/270)                                                                                                                               |             |
|                     |                 | Mansion Memorial      | 27.5263N, 82.5264W  | 11 (10)                                                                | 9 (9/78)                                                                                                                                  |             |
|                     |                 | Skyview Memorial      | 27.5642N, 82.5632W  | 12 (2)                                                                 | 1 (2/3)                                                                                                                                   |             |
|                     |                 | Old Sarasota Cemetery | 27.3655N, 82.5302W  | 11 (8)                                                                 | 7 (7/53)                                                                                                                                  |             |
|                     |                 | Ft. Myers             | American Legion     | 26.3306N, 82.0966W                                                     | 11 (9)                                                                                                                                    | 9 (9/110)   |
|                     |                 |                       | City of Ft. Myers   | 26.6517N, 81.8500W                                                     | 22 (15)                                                                                                                                   | 14 (15/216) |
| Ft. Myers Memorial  |                 |                       | 26.5996N, 81.8844W  | 5 (4)                                                                  | 3 (4/33)                                                                                                                                  |             |
| East Coast          | Jensen Beach    | Oak lawn Memorial     | 26.645N, 81.9982W   | 3 (2)                                                                  | 3 (2/62)                                                                                                                                  |             |
|                     |                 | Lake Trammel          | 26.4372N, 81.4682W  | 12 (1)                                                                 | 1 (1/1)                                                                                                                                   |             |
|                     |                 | All Saints            | 27.2315N, 80.2199W  | 12 (10)                                                                | 7 (10/137)                                                                                                                                |             |
|                     | West Palm Beach | Riverside Memorial    | 26.9722N, 80.1070W  | 7 (100)                                                                | 7 (7/95)                                                                                                                                  |             |
|                     |                 | Fern Hill Memorial    | 27.1862N, 80.2519W  | 15 (7)                                                                 | 6 (7/137)                                                                                                                                 |             |
|                     | Ft. Lauderdale  | Darsey Earl Smith     | 26.6319N, 80.1081W  | 5 (5)                                                                  | 5 (5/72)                                                                                                                                  |             |
|                     |                 | Palm Beach Gardens    | 26.5679N, 80.0671W  | 2 (2)                                                                  | 2 (2/5)                                                                                                                                   |             |
|                     |                 | Pine Crest Lake Worth | 26.6042N, 80.0669W  | 7 (7)                                                                  | 5 (7/154)                                                                                                                                 |             |
|                     |                 | Royal Palm Memorial   | 26.7613N, 80.0648W  | 17 (11)                                                                | 11 (11/132)                                                                                                                               |             |
|                     |                 | Woodlawn Memorial     | 26.4660N, 80.1114W  | 5 (4)                                                                  | 4 (4/39)                                                                                                                                  |             |
|                     | Ft. Lauderdale  | Evergreen Cemetery    | 26.7367N, 80.0837W  | 2 (2)                                                                  | 2 (2/3)                                                                                                                                   |             |
|                     |                 | Dania Beach           | 26.0386N, 80.1480W  | 3 (3)                                                                  | 3 (3/55)                                                                                                                                  |             |
|                     |                 | Evergreen             | 26.0104N, 80.1215W  | 13 (13)                                                                | 11 (13/544)                                                                                                                               |             |
| Forest Lawn North   |                 | 26.2591N, 80.1258W    | 12 (12)             | 12 (12/136)                                                            |                                                                                                                                           |             |
| Hollywood Memorial  |                 | 26.0245N, 80.2155W    | 10 (10)             | 8 (10/153)                                                             |                                                                                                                                           |             |
| Queen of Peace      |                 | 26.2086N, 80.2005W    | 9 (3)               | 3 (3/44)                                                               |                                                                                                                                           |             |
| Pompano Beach       |                 | 26.2273N, 80.0990W    | 2 (2)               | 2 (2/7)                                                                |                                                                                                                                           |             |
| West View Community |                 | 26.2598N, 80.1497W    | 12 (3)              | 2 (3/3)                                                                |                                                                                                                                           |             |

(continued)

SUPPLEMENTAL TABLE 1  
Continued

| Coast | City     | Cemetery          | Latitude, Longitude | # Of vases collected per cemetery (# positive for <i>Ae. aegypti</i> ) | # <i>Ae. aegypti</i> amplified per cemetery (# vases amplified <i>Ae. aegypti</i> came from/total # of mosquitoes collected per cemetery) |
|-------|----------|-------------------|---------------------|------------------------------------------------------------------------|-------------------------------------------------------------------------------------------------------------------------------------------|
|       | Miami    | Biscayne Garden   | 25.7937N, 80.1941W  | 8 (8)                                                                  | 10 (5/291)                                                                                                                                |
|       |          | Coconut Grove     | 25.7254N, 80.2532W  | 11 (11)                                                                | 10 (5/1598)                                                                                                                               |
|       |          | Dade Memorial     | 25.9035N, 80.2231W  | 25 (17)                                                                | 10 (5/126)                                                                                                                                |
|       |          | Lincoln Memorial  | 25.8179N, 80.4130W  | 11 (10)                                                                | 10 (5/277)                                                                                                                                |
|       |          | Southern Memorial | 25.9195N, 80.1664W  | 20 (13)                                                                | 10 (5/138)                                                                                                                                |
|       |          | Woodlawn Memorial | 25.7647N, 80.2503W  | 11 (11)                                                                | 10 (5/286)                                                                                                                                |
|       | Key West | Key West Cemetery | 25.03295N, 80.4755W | 10 (10)                                                                | 10 (10/39)                                                                                                                                |

SUPPLEMENTAL TABLE 2  
Presence-absence matrix of identified *Aedes aegypti* partial *ND4* and *ND5* haplotypes from South Florida

| Haplotypes | Cities |                |          |           |       |                |                 |              |          |
|------------|--------|----------------|----------|-----------|-------|----------------|-----------------|--------------|----------|
|            | Tampa  | St. Petersburg | Palmetto | Ft. Myers | Miami | Ft. Lauderdale | West Palm Beach | Jensen Beach | Key West |
| AEF1       | 1      | 0              | 0        | 0         | 0     | 0              | 0               | 0            | 0        |
| AEF2       | 1      | 0              | 0        | 0         | 0     | 0              | 0               | 0            | 0        |
| AEF3       | 1      | 0              | 0        | 0         | 0     | 0              | 0               | 0            | 0        |
| AEF4       | 1      | 1              | 1        | 1         | 1     | 1              | 1               | 1            | 0        |
| AEF5       | 1      | 0              | 0        | 0         | 0     | 0              | 0               | 0            | 0        |
| AEF6       | 1      | 1              | 1        | 1         | 1     | 1              | 1               | 1            | 1        |
| AEF7       | 1      | 1              | 0        | 0         | 0     | 1              | 0               | 0            | 0        |
| AEF8       | 1      | 0              | 0        | 0         | 0     | 0              | 0               | 1            | 0        |
| AEF9       | 1      | 0              | 0        | 0         | 0     | 0              | 0               | 0            | 0        |
| AEF10      | 1      | 1              | 1        | 1         | 1     | 1              | 0               | 1            | 0        |
| AEF11      | 1      | 0              | 0        | 0         | 0     | 0              | 0               | 0            | 0        |
| AEF12      | 1      | 0              | 0        | 0         | 0     | 0              | 0               | 0            | 0        |
| AEF13      | 1      | 0              | 0        | 0         | 0     | 0              | 0               | 0            | 0        |
| AEF14      | 1      | 1              | 1        | 1         | 0     | 1              | 1               | 1            | 1        |
| AEF15      | 1      | 0              | 0        | 0         | 0     | 0              | 0               | 0            | 0        |
| AEF16      | 1      | 1              | 0        | 0         | 0     | 0              | 0               | 0            | 0        |
| AEF17      | 1      | 1              | 0        | 0         | 0     | 0              | 1               | 0            | 0        |
| AEF18      | 1      | 0              | 0        | 0         | 0     | 0              | 0               | 0            | 0        |
| AEF19      | 1      | 0              | 0        | 0         | 0     | 0              | 0               | 0            | 0        |
| AEF20      | 0      | 0              | 1        | 0         | 0     | 0              | 0               | 0            | 0        |
| AEF21      | 0      | 0              | 1        | 1         | 0     | 1              | 1               | 0            | 0        |
| AEF22      | 0      | 0              | 1        | 0         | 1     | 0              | 0               | 0            | 0        |
| AEF23      | 0      | 1              | 1        | 0         | 1     | 0              | 0               | 0            | 0        |
| AEF24      | 0      | 1              | 1        | 0         | 0     | 1              | 0               | 0            | 0        |
| AEF25      | 0      | 0              | 1        | 0         | 0     | 0              | 0               | 0            | 0        |
| AEF26      | 0      | 0              | 1        | 0         | 0     | 1              | 0               | 0            | 0        |
| AEF27      | 0      | 0              | 1        | 0         | 0     | 0              | 0               | 0            | 0        |
| AEF28      | 0      | 0              | 1        | 0         | 0     | 0              | 0               | 0            | 0        |
| AEF29      | 0      | 0              | 1        | 1         | 0     | 1              | 1               | 0            | 0        |
| AEF30      | 0      | 0              | 1        | 0         | 0     | 0              | 0               | 1            | 0        |
| AEF31      | 0      | 1              | 0        | 0         | 1     | 1              | 1               | 1            | 0        |
| AEF32      | 0      | 1              | 0        | 0         | 0     | 0              | 0               | 0            | 0        |
| AEF33      | 0      | 1              | 0        | 0         | 0     | 0              | 1               | 0            | 0        |
| AEF34      | 0      | 1              | 0        | 0         | 0     | 0              | 0               | 0            | 0        |
| AEF35      | 0      | 1              | 0        | 0         | 0     | 0              | 0               | 0            | 0        |
| AEF36      | 0      | 1              | 0        | 0         | 0     | 1              | 0               | 0            | 0        |
| AEF37      | 0      | 1              | 0        | 0         | 0     | 1              | 0               | 0            | 0        |
| AEF38      | 0      | 1              | 0        | 0         | 0     | 0              | 0               | 0            | 0        |
| AEF39      | 0      | 1              | 0        | 0         | 0     | 0              | 0               | 0            | 0        |
| AEF40      | 0      | 0              | 0        | 1         | 0     | 0              | 0               | 0            | 0        |
| AEF41      | 0      | 0              | 0        | 1         | 0     | 0              | 0               | 0            | 0        |
| AEF42      | 0      | 0              | 0        | 0         | 1     | 0              | 0               | 0            | 0        |
| AEF43      | 0      | 0              | 0        | 0         | 1     | 0              | 1               | 0            | 0        |
| AEF44      | 0      | 0              | 0        | 0         | 1     | 0              | 0               | 0            | 0        |
| AEF45      | 0      | 0              | 0        | 0         | 1     | 0              | 0               | 0            | 0        |
| AEF46      | 0      | 0              | 0        | 0         | 1     | 0              | 0               | 0            | 0        |
| AEF47      | 0      | 0              | 0        | 0         | 1     | 0              | 0               | 0            | 0        |
| AEF48      | 0      | 0              | 0        | 0         | 1     | 0              | 0               | 0            | 0        |
| AEF49      | 0      | 0              | 0        | 0         | 1     | 0              | 0               | 0            | 0        |
| AEF50      | 0      | 0              | 0        | 0         | 1     | 0              | 0               | 0            | 0        |

(continued)

SUPPLEMENTAL TABLE 2

Continued

| Haplotypes   | Cities    |                |           |           |           |                |                 |              |          |
|--------------|-----------|----------------|-----------|-----------|-----------|----------------|-----------------|--------------|----------|
|              | Tampa     | St. Petersburg | Palmetto  | Ft. Myers | Miami     | Ft. Lauderdale | West Palm Beach | Jensen Beach | Key West |
| AEF51        | 0         | 0              | 0         | 0         | 1         | 0              | 0               | 0            | 0        |
| AEF52        | 0         | 0              | 0         | 0         | 0         | 1              | 0               | 0            | 0        |
| AEF53        | 0         | 0              | 0         | 0         | 0         | 1              | 0               | 0            | 0        |
| AEF54        | 0         | 0              | 0         | 0         | 0         | 1              | 0               | 0            | 0        |
| AEF55        | 0         | 0              | 0         | 0         | 0         | 1              | 0               | 0            | 0        |
| AEF56        | 0         | 0              | 0         | 0         | 0         | 1              | 0               | 0            | 0        |
| AEF57        | 0         | 0              | 0         | 0         | 0         | 1              | 0               | 0            | 0        |
| AEF58        | 0         | 0              | 0         | 0         | 0         | 1              | 0               | 0            | 0        |
| AEF59        | 0         | 0              | 0         | 0         | 0         | 1              | 0               | 0            | 0        |
| AEF60        | 0         | 0              | 0         | 0         | 0         | 0              | 1               | 0            | 0        |
| AEF61        | 0         | 0              | 0         | 0         | 0         | 0              | 1               | 0            | 0        |
| AEF62        | 0         | 0              | 0         | 0         | 0         | 0              | 1               | 0            | 0        |
| AEF63        | 0         | 0              | 0         | 0         | 0         | 0              | 1               | 0            | 0        |
| AEF64        | 0         | 0              | 0         | 0         | 0         | 0              | 1               | 0            | 0        |
| AEF65        | 0         | 0              | 0         | 0         | 0         | 0              | 0               | 1            | 0        |
| AEF66        | 0         | 0              | 0         | 0         | 0         | 0              | 0               | 1            | 0        |
| AEF67        | 0         | 0              | 0         | 0         | 0         | 0              | 0               | 1            | 0        |
| AEF68        | 0         | 0              | 0         | 0         | 0         | 0              | 0               | 1            | 0        |
| <b>Total</b> | <b>19</b> | <b>18</b>      | <b>15</b> | <b>8</b>  | <b>16</b> | <b>20</b>      | <b>14</b>       | <b>11</b>    | <b>2</b> |

SUPPLEMENTAL TABLE 3

Summary statistics of partial *ND4* and *ND5* mitochondrial DNA fragments across cemeteries in South Florida

| City (# of individuals) | # Of haplotypes<br>(# of segregating sites) | Haplotype<br>diversity ( <i>Hd</i> ) | Nucleotide<br>diversity ( $\pi$ ) | # Of nucleotide<br>differences ( <i>k</i> ) |
|-------------------------|---------------------------------------------|--------------------------------------|-----------------------------------|---------------------------------------------|
| West Coast              |                                             |                                      |                                   |                                             |
| Tampa (59)              | 19 (29)                                     | 0.81590                              | 0.01417                           | 10.77031                                    |
| St. Petersburg (75)     | 18 (27)                                     | 0.86775                              | 0.01303                           | 9.90559                                     |
| Palmetto (39)           | 15 (28)                                     | 0.89474                              | 0.01410                           | 10.71795                                    |
| Ft. Myers (30)          | 8 (22)                                      | 0.84114                              | 0.01289                           | 9.8000                                      |
| West Coast total (203)  | 41 (33)                                     | 0.870                                | 0.01362                           | 10.348                                      |
| East Coast              |                                             |                                      |                                   |                                             |
| Miami (60)              | 16 (27)                                     | 0.78192                              | 0.01243                           | 9.44633                                     |
| Ft. Lauderdale (41)     | 20 (28)                                     | 0.93537                              | 0.01347                           | 10.23537                                    |
| West Palm Beach (29)    | 15 (27)                                     | 0.94089                              | 0.01317                           | 10.00985                                    |
| Jensen Beach (19)       | 12 (25)                                     | 0.92398                              | 0.01143                           | 8.69006                                     |
| East Coast total (149)  | 45 (31)                                     | 0.901                                | 0.01329                           | 10.097                                      |
| Key West (10)           | 3 (20)                                      | 0.6444                               | 0.00705                           | 5.35556                                     |
| Overall total (362)     | 68 (35)                                     | 0.88612                              | 0.01343                           | 10.20699                                    |

SUPPLEMENTAL TABLE 4

Partitioning of variance components and *FST* of partial *ND4* and *ND5* mitochondrial haplotypes identified from cities in south Florida excluding Key West

| Source of variation             | df  | Sum of squares | Variance components | % Variation | $\Phi$ -statistics |
|---------------------------------|-----|----------------|---------------------|-------------|--------------------|
| East Coast and West Coast       |     |                |                     |             |                    |
| Among groups                    | 1   | 10.79          | -0.008              | -0.16       | -0.00159           |
| Among cities within groups      | 6   | 67.042         | 0.14628             | 2.84        | 0.02835*           |
| Within cities                   | 345 | 1729.459       | 5.01304             | 97.32       | 0.02681**          |
| Total                           | 352 | 1807.332       | 5.15115             |             |                    |
| Within West Coast               |     |                |                     |             |                    |
| Among cities                    | 3   | 21.556         | -0.01242            | -0.24       | -0.00240           |
| Among cemeteries within cities  | 19  | 136.273        | 0.26623             | 5014        | 0.05128            |
| Within cemeteries in west coast | 181 | 891.504        | 4.92544             | 95.10       | 0.04901*           |
| Total                           | 203 | 1049.33        | 5.17926             |             |                    |
| Within East Coast               |     |                |                     |             |                    |
| Among cities                    | 3   | 45.486         | 0.28628             | 5.58        | 0.05577*           |
| Among cemeteries within cities  | 18  | 90.882         | 0.03676             | 0.72        | 0.00759            |
| Within cemeteries in east coast | 128 | 610.840        | 4.80977             | 93.71       | 0.06294            |
| Total                           | 149 | 747.208        | 5.13280             |             |                    |

\* $P < 0.05$ ; \*\* $P < 0.001$ .

SUPPLEMENTAL TABLE 5

Above diagonal: Effective number of migrants ( $Nm$ ) between pairwise populations. Below diagonal: Pairwise  $F_{ST}$  values between sampled cities in south Florida

| City            | Tampa    | St. Petersburg | Palmetto | Ft Myers   | Miami      | Ft. Lauderdale | West Palm Beach | Jensen Beach | Key West |
|-----------------|----------|----------------|----------|------------|------------|----------------|-----------------|--------------|----------|
| Tampa           | –        | 102.25         | 64.67    | <i>Inf</i> | 15.11      | 19.31          | 83.32           | 7.32         | 2.92     |
| St. Petersburg  | 0.00487  | –              | 18.61    | <i>Inf</i> | 57.63      | 1549.66        | 1040.49         | 3.44         | 6.5      |
| Palmetto        | 0.00767  | 0.02616        | –        | 12.61      | 5.87       | 10.09          | 18.02           | 7.33         | 2.3      |
| Ft. Myers       | –0.00167 | –0.01834       | 0.03744  | –          | <i>Inf</i> | <i>Inf</i>     | <i>Inf</i>      | 3.55         | 7.44     |
| Miami           | 0.03203  | 0.00860        | 0.07839  | –0.01127   | –          | 42.13          | <i>Inf</i>      | 2.61         | 9.76     |
| Ft. Lauderdale  | 0.02523  | 0.00032        | 0.04720  | –0.00148   | 0.01173    | –              | 42.13           | 2.2          | 7.12     |
| West Palm Beach | 0.00596  | 0.00048        | 0.02699  | –0.01305   | –0.00698   | 0.01934        | –               | 5.66         | 6.17     |
| Jensen Beach    | 0.06389  | 0.12673        | 0.06384  | 0.12673    | 0.16052    | 0.18501*       | 0.08106         | –            | 0.992    |
| Key West        | 0.14578  | 0.07136        | 0.17815  | 0.06296    | 0.04872    | 0.06557        | 0.07495         | 0.33492*     | –        |

\*  $P < 0.0013$  after Bonferroni correction.

*Inf* = infinity.

SUPPLEMENTAL TABLE 6

Tests for deviation from neutrality for partial  $ND4$  and  $ND5$  mitochondrial DNA across cities in south Florida

| City (# of individuals) | Tajima's $D$ | Fu & Li's $D^*$ | Fu & Li's $F^*$ | Fu's $F$ | Ramos and Rozas $R_2$ |
|-------------------------|--------------|-----------------|-----------------|----------|-----------------------|
| West Coast              |              |                 |                 |          |                       |
| Tampa (59)              | 2.3509*      | 1.26660         | 1.97893*        | 0.993    | 0.1846                |
| St. Petersburg (75)     | 2.4718*      | 0.53021         | 1.49895         | 2.058    | 0.1820                |
| Palmetto (39)           | 2.1245*      | 0.98500         | 1.62423         | 1.366    | 0.1884                |
| Ft. Myers (30)          | 2.6904*      | 1.36661         | 2.1055*         | 5.815    | 0.2214                |
| West Coast (203)        | 2.41759*     | 0.96659         | –3.371          | 1.897*   | 0.1564                |
| East Coast              |              |                 |                 |          |                       |
| Jensen Beach (19)       | 0.08418      | 0.97538         | 1.08743         | –0.872   | 0.1686                |
| West Palm Beach (29)    | 1.46085      | 0.08895         | 0.62268         | –0.338   | 0.1787                |
| Ft. Lauderdale (41)     | 1.74380      | 0.75631         | 1.29793         | –1.513   | 0.1796                |
| Miami (60)              | 2.02714      | 1.5149*         | 2.02604*        | 1.985    | 0.1744                |
| East Coast (149)        | 2.08000      | 0.67046         | 1.49893         | –8.626   | 0.1621                |
| Key West (10)           | –1.13979     | –1.61409        | –1.68665        | 5.152    | 0.2460                |
| Overall (362)           | 2.15858*     | 0.65842         | 1.5961          | –16.90   | 0.1455                |

\*  $P < 0.05$ .

SUPPLEMENTAL TABLE 7

Fixation indices corresponding to the groups of populations inferred by SAMOVA analysis for *Aedes aegypti* populations in south Florida (without Key West) tested for partial  $ND4$  and  $ND5$  mitochondrial sequences

| No. of groups | Group composition                           | $F_{SC}$ | $F_{ST}$ | $F_{CT}$  |
|---------------|---------------------------------------------|----------|----------|-----------|
| 2             | 1. Jensen Beach<br>2. All other populations | 0.1416*  | 0.08201  | 0.06883** |

\*  $P < 0.05$ .

\*\*  $P < 0.001$ .
